# Supplementary material
Source: Springer Nature journal article supplement (https://www.springermedizin.de/resource/supplementary/12885_2007_1054_MOESM4_ESM.pdf/9470990)
Supplement: MOESM4 [file 9470990]

**A****MDM2: event-free survival**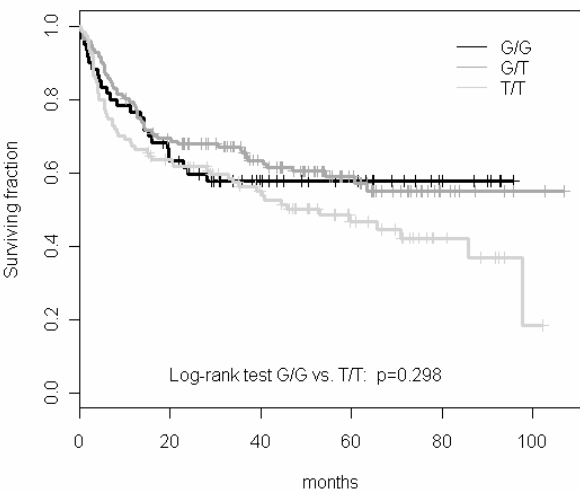**No. at Risk**

|     | 0   | 20 | 40 | 60 | 80 | 100 |
|-----|-----|----|----|----|----|-----|
| G/G | 60  | 37 | 23 | 16 | 6  | 0   |
| G/T | 141 | 95 | 65 | 34 | 8  | 2   |
| T/T | 110 | 67 | 45 | 24 | 9  | 1   |

**MDM2: overall survival**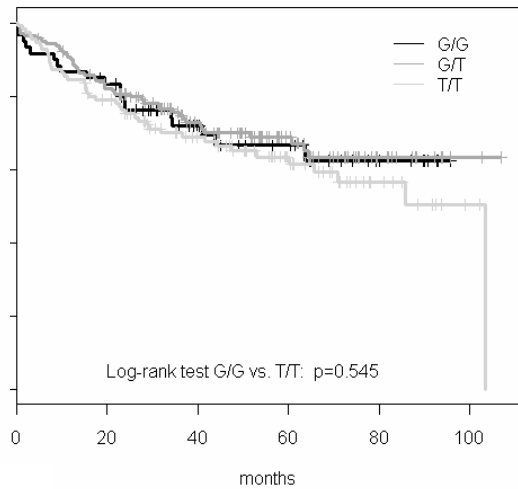

|     | 0   | 20 | 40 | 60 | 80 | 100 |
|-----|-----|----|----|----|----|-----|
| G/G | 49  | 29 | 19 | 7  | 0  | 0   |
| G/T | 112 | 75 | 42 | 13 | 2  | 2   |
| T/T | 84  | 56 | 33 | 12 | 2  | 2   |

**B****p53: event-free survival**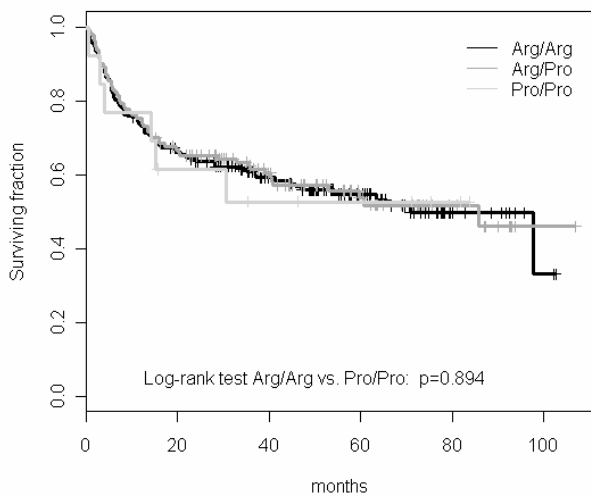**No. at Risk**

|         | 0   | 20  | 40 | 60 | 80 | 100 |
|---------|-----|-----|----|----|----|-----|
| Arg/Arg | 168 | 108 | 72 | 42 | 11 | 2   |
| Arg/Pro | 130 | 84  | 56 | 28 | 10 | 1   |
| Pro/Pro | 13  | 7   | 5  | 4  | 2  | 0   |

**p53: overall survival**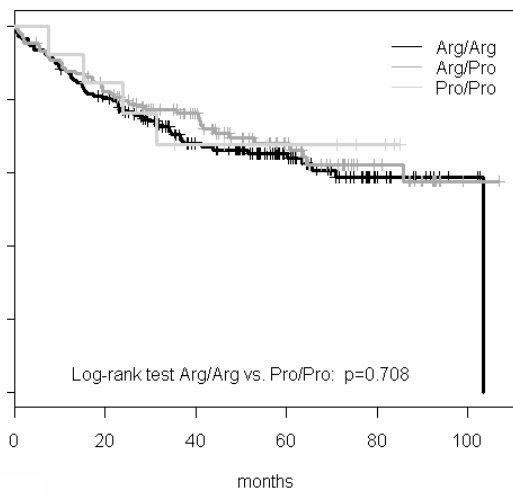

|         | 0   | 20 | 40 | 60 | 80 | 100 |
|---------|-----|----|----|----|----|-----|
| Arg/Arg | 132 | 81 | 49 | 14 | 3  | 3   |
| Arg/Pro | 103 | 72 | 40 | 15 | 1  | 1   |
| Pro/Pro | 10  | 7  | 5  | 3  | 0  | 0   |
